# Supplementary material for: CARMA3 Promotes Colorectal Cancer Cell Motility and Cancer Stemness via YAP-Mediated NF-κB Activation
Source: MDPI journal article supplement (doi:10.3390/cancers13235946), 2021-11-26
Supplement: s1 [file s1]

## Supplemental data

### CARMA3 promotes colorectal cancer cell motility and cancer stemness via YAP-mediated NF- $\kappa$ B activation

Ting-Yu Chan, Cheng-Tien Wu, Meei-Ling Sheu, Rong-Sen Yang and Shing-Hwa Liu

#### Supplementary File S1

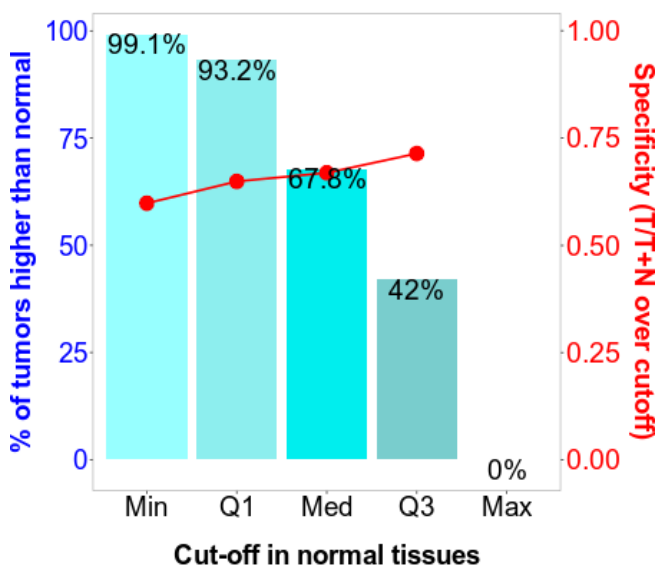

**Supplementary Figure S1.** The sensitivity/specificity plot of CARD10 gene expression in colon cancer when compared tumor and normal RNA-sequencing data, which were downloaded from TNMplot (TNMplot.com: A Web Tool for the Comparison of Gene Expression in Normal, Tumor and Metastatic Tissues; <https://tnmplot.com/analysis/>). The bars represent the sensitivity: percentage of tumors which CARD10 gene expression is higher than normal samples (blue words). The specificity is shown as red words and red line.

## Supplementary File S2

### Western blot raw data

#### 1. Figure S2A

Cell: SW480, SW620, HT-29, HCT116 cells

Protein: CARMA3 (116 kDa)

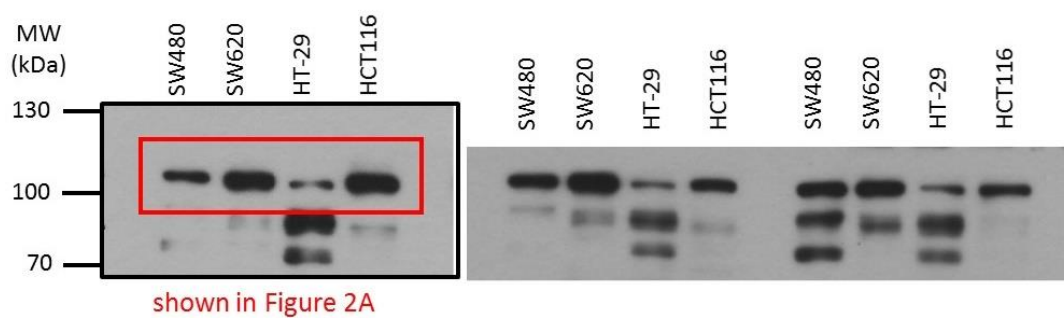

#### 2. Figure S2A

Cell: SW480, SW620, HT-29, HCT116 cells

Protein:  $\alpha$ -Tubulin (55 kDa)

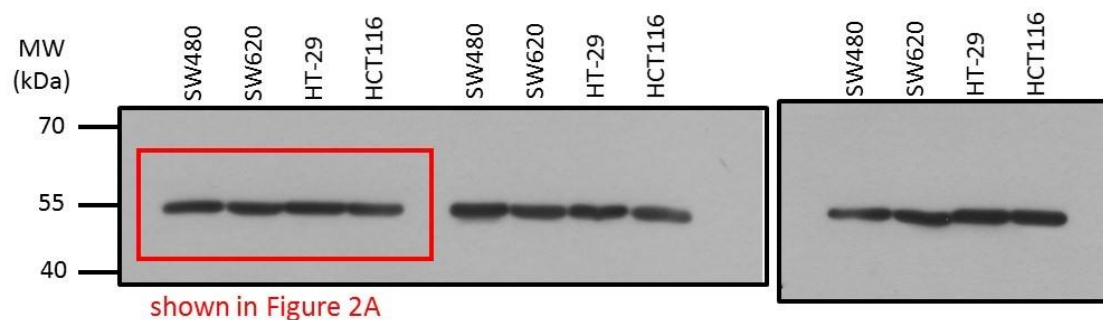

#### 3. Figure S2B-a

Overexpression of CARMA3 by plasmid transfection

Cell: SW480 cell

Protein: CARMA3 (116 kDa)

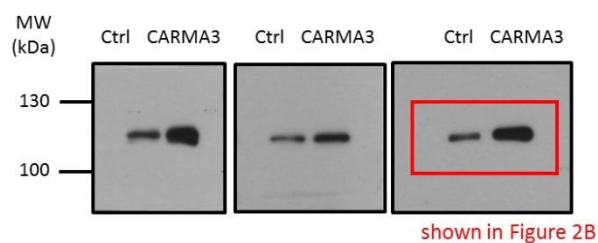

#### 4. Figure S2B-a

Overexpression of CARMA3 by plasmid transfection  
 Cell: SW480 cell  
 Protein:  $\alpha$ -Tubulin (55 kDa)

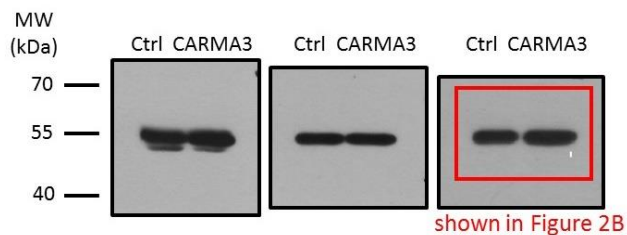

### 5. Figure S2B-a

Overexpression of CARMA3 by plasmid transfection  
 Cell: HT-29 cells  
 Protein: CARMA3 (116 kDa)

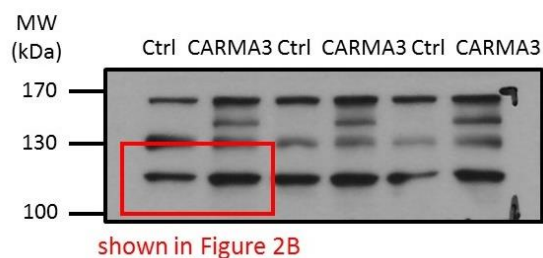

### 6. Figure S2B-b

Overexpression of CARMA3 by plasmid transfection  
 Cell: HT-29 cell  
 Protein:  $\alpha$ -Tubulin (55 kDa)

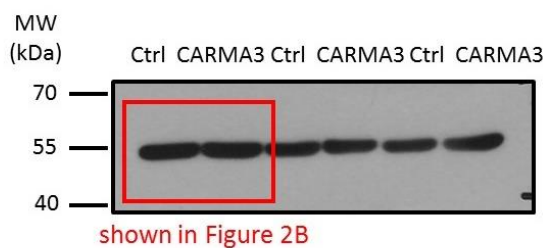

### 7. Figure S2F-a

Knockdown of CARMA3 by shRNA lentivirus infection  
 Cell: SW620 cell  
 Protein: CARMA3 (116 kDa)

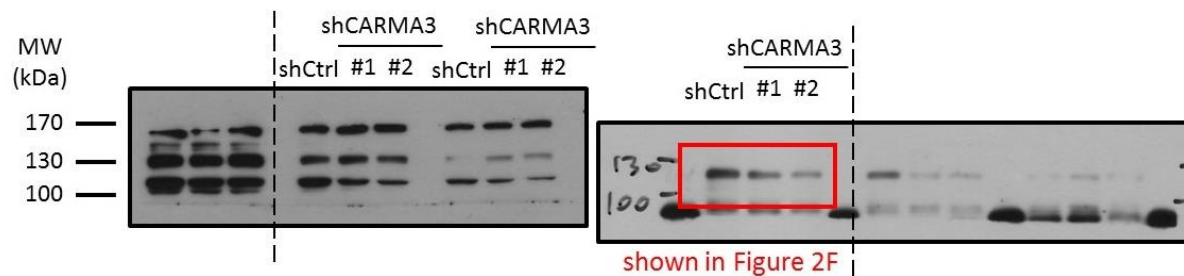

### 8. Figure S2F-a

Knockdown of CARMA3 by shRNA lentivirus infection  
Cell: SW620 cell  
Protein:  $\alpha$ -Tubulin (55 kDa)

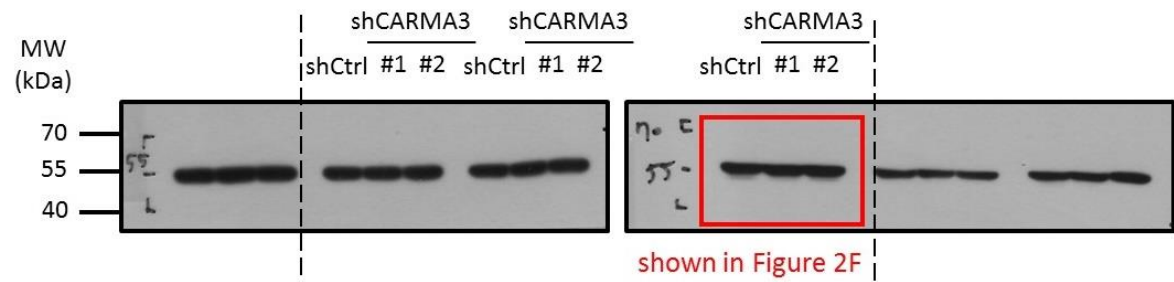

9. Figure S2F-b

Knockdown of CARMA3 by shRNA lentivirus infection  
Cell: HCT116 cell  
Protein: CARMA3 (116 kDa)

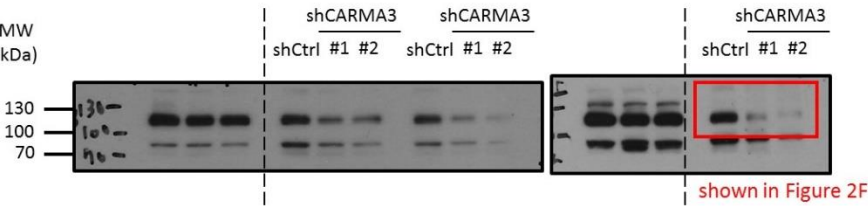

10. Figure S2F-b

Knockdown of CARMA3 by shRNA lentivirus infection  
Cell: HCT116 cell  
Protein:  $\alpha$ -Tubulin (55 kDa)

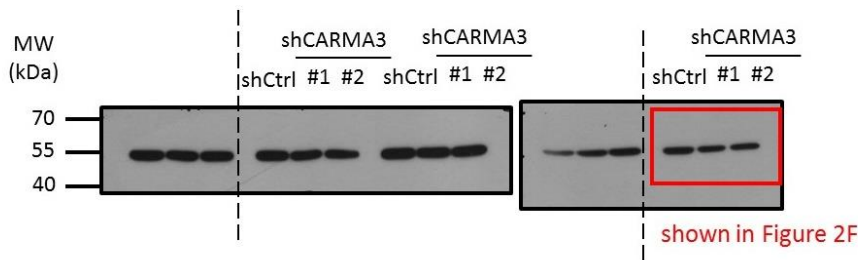

11. Figure S3B

Animal model  
Knockdown of CARMA3 in HCT116 cells by shRNA lentivirus infection  
Tumor tissues  
Protein: CARMA3 (116 kDa)

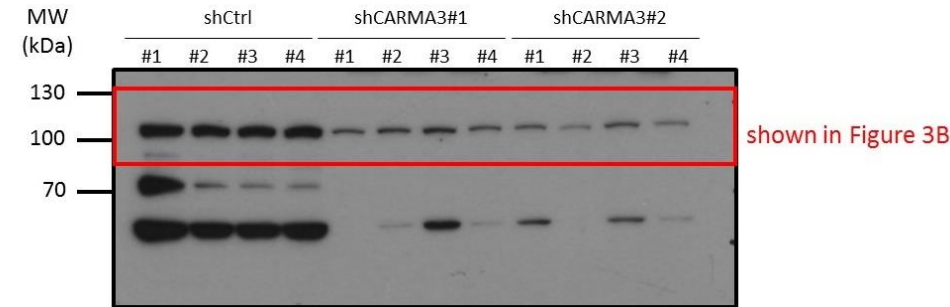

12. Figure S3B

Animal model  
Knockdown of CARMA3 in HCT116 cells by shRNA lentivirus infection  
Tumor tissues  
Protein:  $\alpha$ -Tubulin (55 kDa)

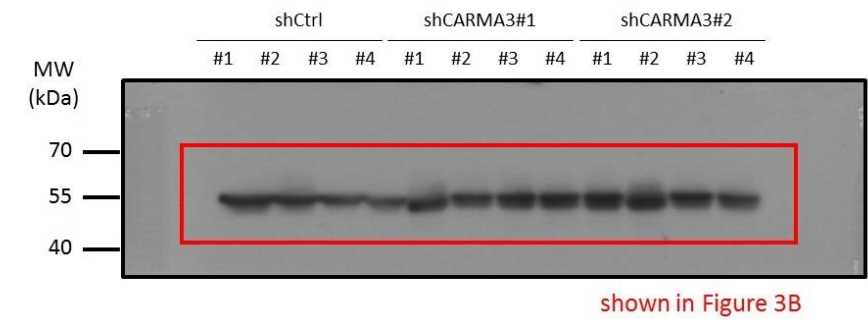

13. Figure S5A-a

Overexpression of CARMA3 by plasmid transfection  
Cell: SW480 cell  
Protein: CARMA3 (116 kDa)

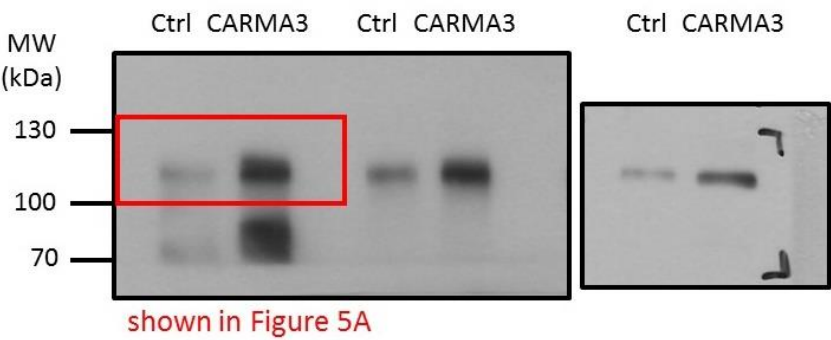

14. Figure S5A-a

Overexpression of CARMA3 by plasmid transfection  
Cell: SW480 cell  
Protein: E-cadherin (135 kDa)

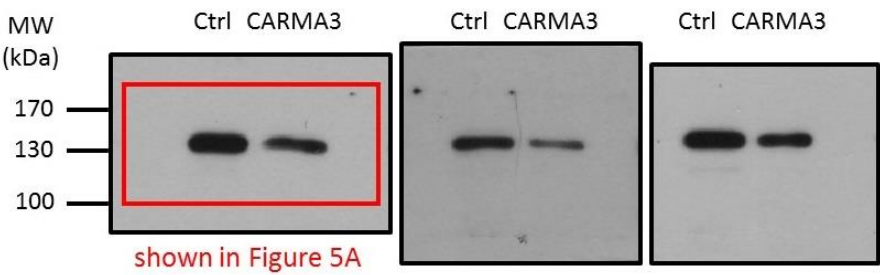

15. Figure S5A-a

Overexpression of CARMA3 by plasmid transfection  
Cell: SW480 cell  
Protein: N-cadherin (140 kDa)

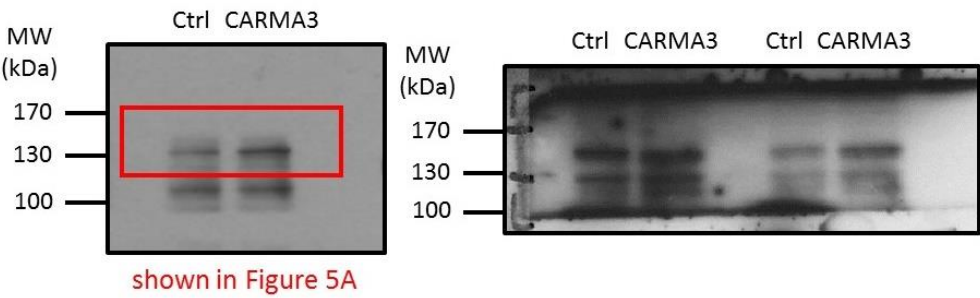

16. Figure S5A-a

Overexpression of CARMA3 by plasmid transfection  
Cell: SW480 cell  
Protein: Fibronectin (240 kDa)

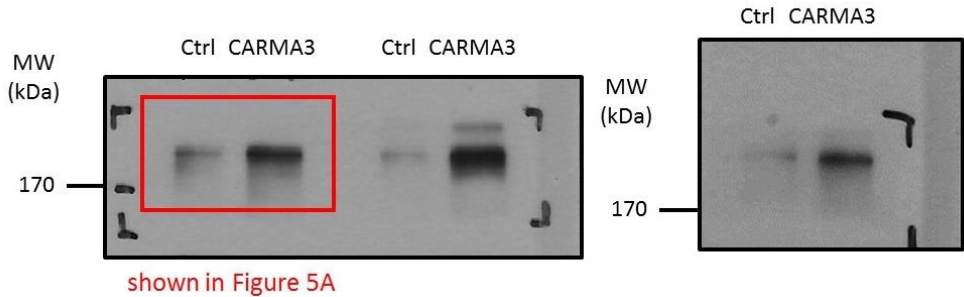

17. Figure S5A-a

Overexpression of CARMA3 by plasmid transfection  
Cell: SW480 cell  
Protein: Slug (30 kDa)

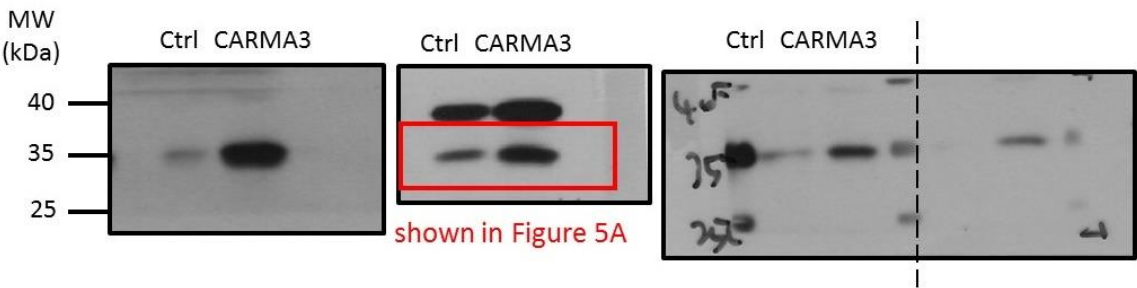

18. Figure S5A-a

Overexpression of CARMA3 by plasmid transfection  
Cell: SW480 cell  
Protein: Snail (29 kDa)

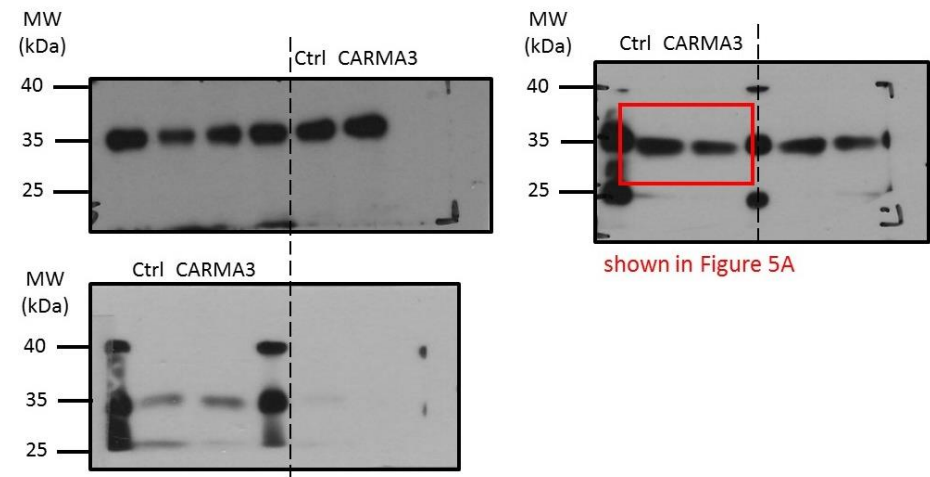

19. Figure S5A-a

Overexpression of CARMA3 by plasmid transfection  
Cell: SW480 cell  
Protein:  $\alpha$ -Tubulin (55 kDa)

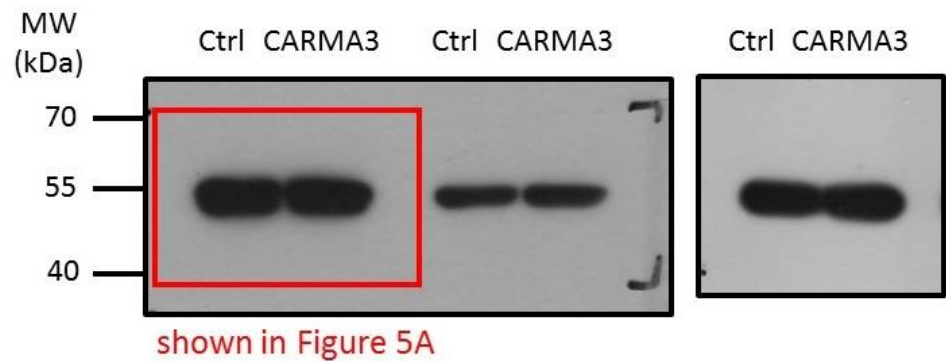

20. Figure S5A-b

Knockdown of CARMA3 by shRNA lentivirus infection  
Cell: HCT116 cell  
Protein: CARMA3 (116 kDa)

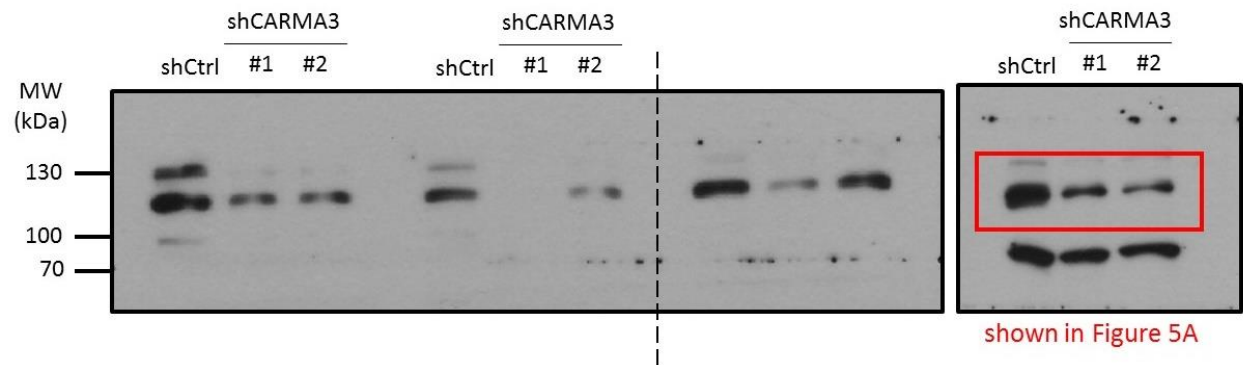

21. Figure S5A-b



Knockdown of CARMA3 by shRNA lentivirus infection  
Cell: HCT116 cell  
Protein: E-cadherin (135 kDa)

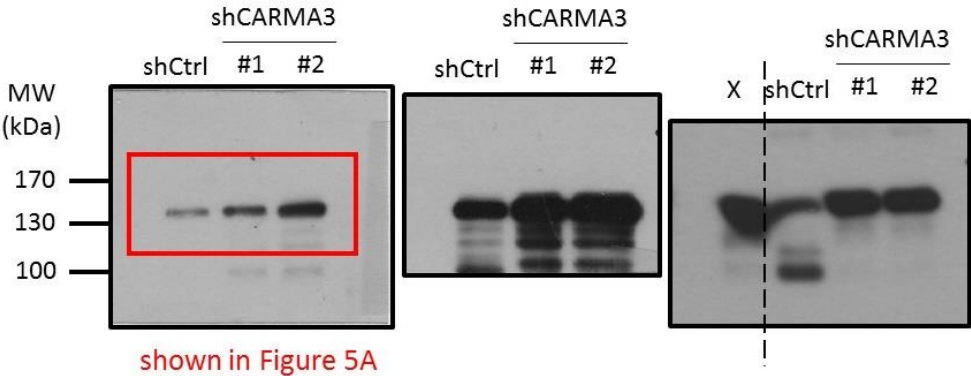

22. Figure S5A-b

Knockdown of CARMA3 by shRNA lentivirus infection  
Cell: HCT116 cell  
Protein: N-cadherin (140 kDa)

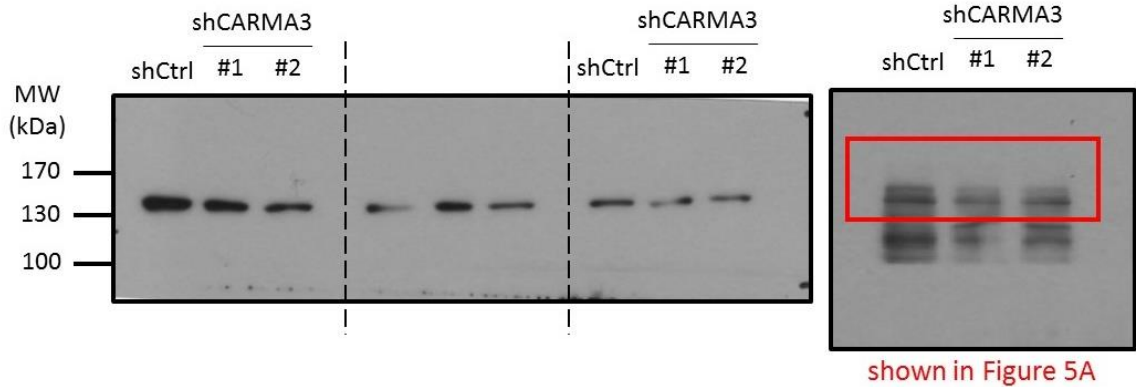

23. Figure S5A-b

Knockdown of CARMA3 by shRNA lentivirus infection  
Cell: HCT116 cell  
Protein: Fibronectin (240 kDa)

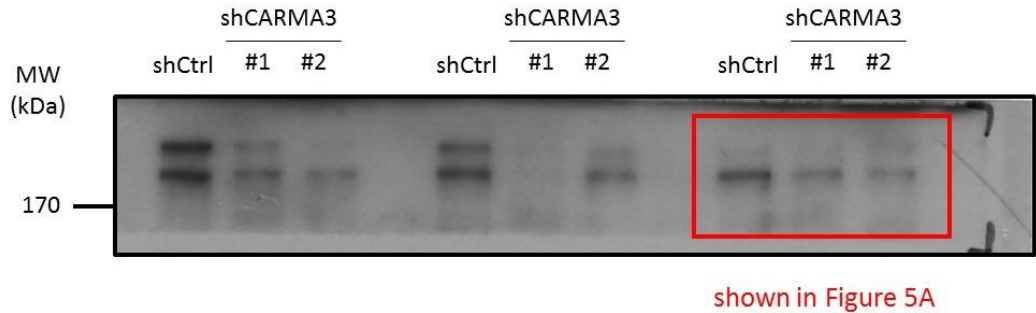

24. Figure S5A-b



Knockdown of CARMA3 by shRNA lentivirus infection  
Cell: HCT116 cell  
Protein: Slug (30 kDa)

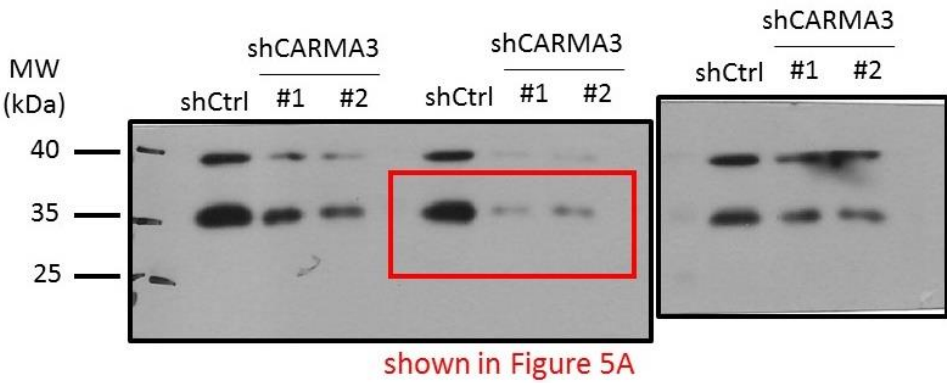

25. Figure S5A-b

Knockdown of CARMA3 by shRNA lentivirus infection  
Cell: HCT116 cell  
Protein: Snail (29 kDa)

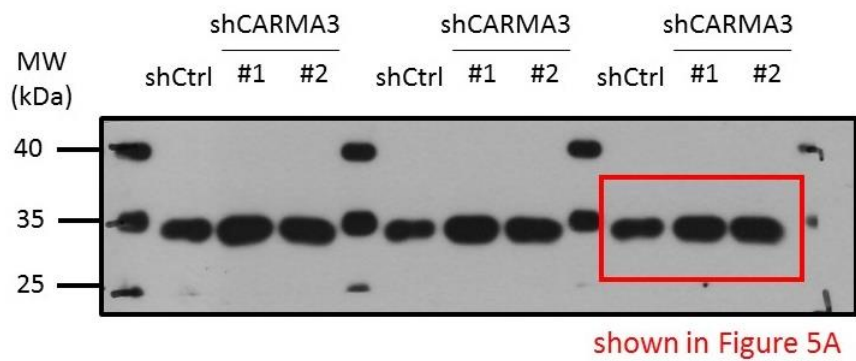

26. Figure S5A-b

Knockdown of CARMA3 by shRNA lentivirus infection  
Cell: HCT116 cell  
Protein:  $\alpha$ -Tubulin (55 kDa)

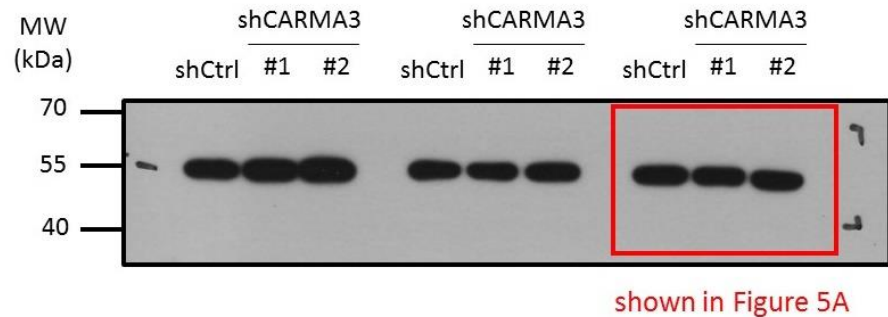

27. Figure S5C

Re-overexpression of Slug in CARMA3-knocked down cells by plasmid transfection  
Cell: HCT116 cell  
Protein: CARMA3 (116 kDa)

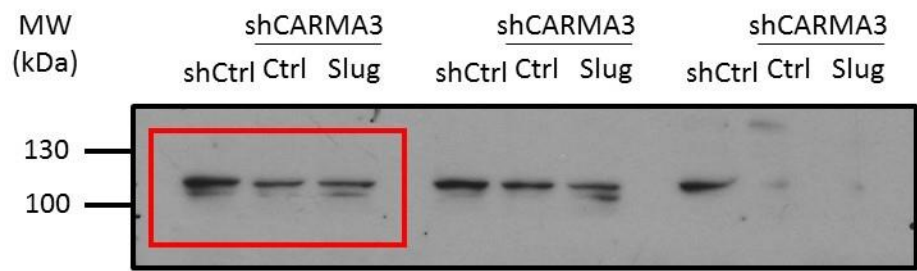

shown in Figure 5C

28. Figure S5C

Knockdown of CARMA3 by shRNA lentivirus infection  
Cell: HCT116 cell  
Protein: Slug (30 kDa)

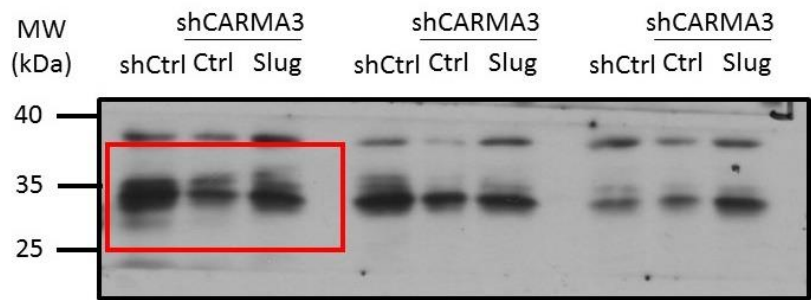

shown in Figure 5C

29. Figure S5C

Knockdown of CARMA3 by shRNA lentivirus infection  
Cell: HCT116 cell  
Protein: α-Tubulin (55 kDa)

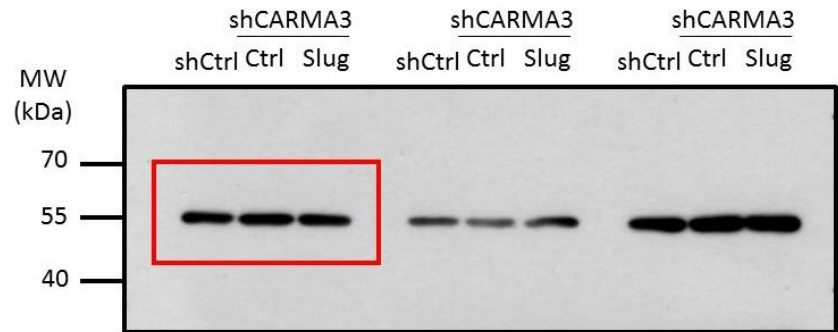

shown in Figure 5C

30. Figure S6A-a

Overexpression of CARMA3 by plasmid transfection  
Cell: SW480 cell  
Protein: CARMA3 (116 kDa)

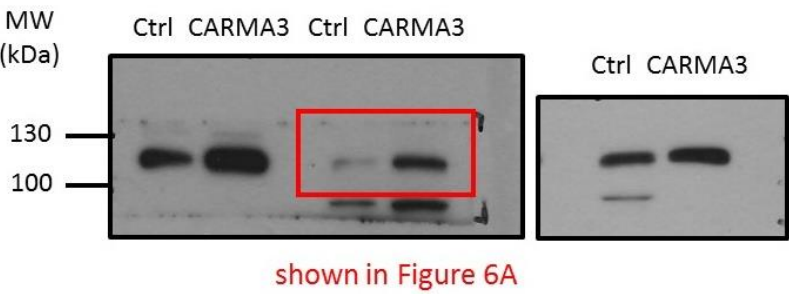

31. Figure S6A-a

Overexpression of CARMA3 by plasmid transfection  
Cell: SW480 cell  
Protein: YAP (65-78 kDa)

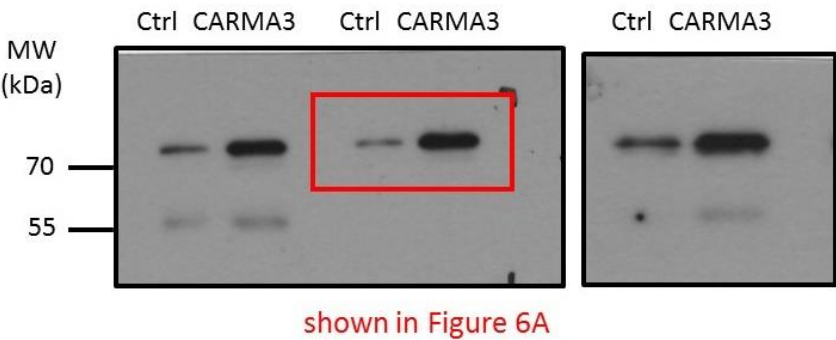

32. Figure S6A-a

Overexpression of CARMA3 by plasmid transfection  
Cell: SW480 cell  
Protein: Slug (30 kDa)

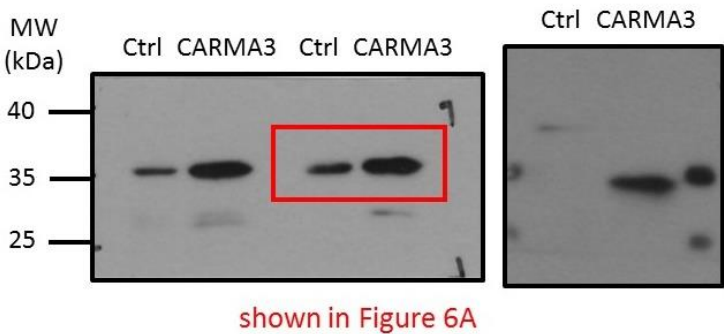

33. Figure S6A-a

Overexpression of CARMA3 by plasmid transfection  
Cell: SW480 cell  
Protein:  $\alpha$ -Tubulin (55 kDa)

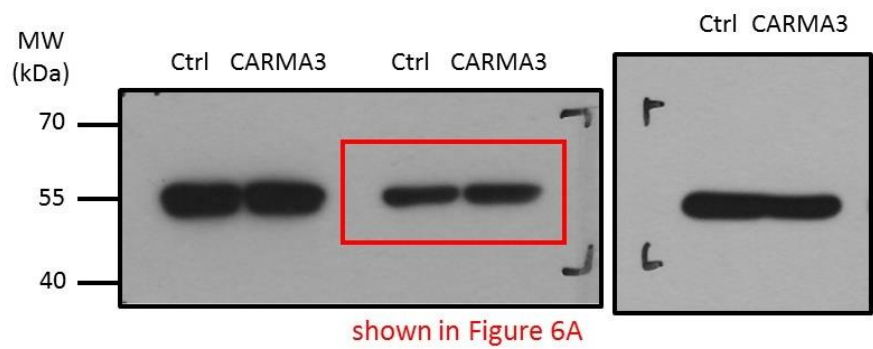

34. Figure S6A-b

Knockdown of CARMA3 by shRNA lentivirus infection  
Cell: HCT116 cell  
Protein: CARMA3 (116 kDa)

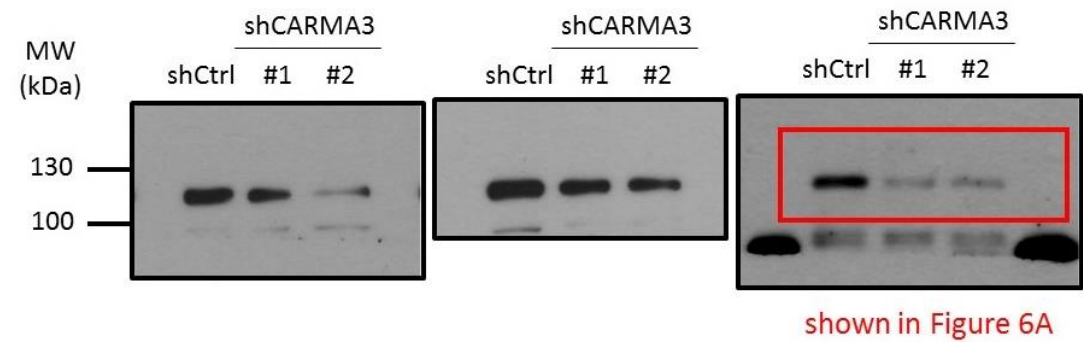

35. Figure S6A-b

Knockdown of CARMA3 by shRNA lentivirus infection  
Cell: HCT116 cell  
Protein: YAP (65-78 kDa)

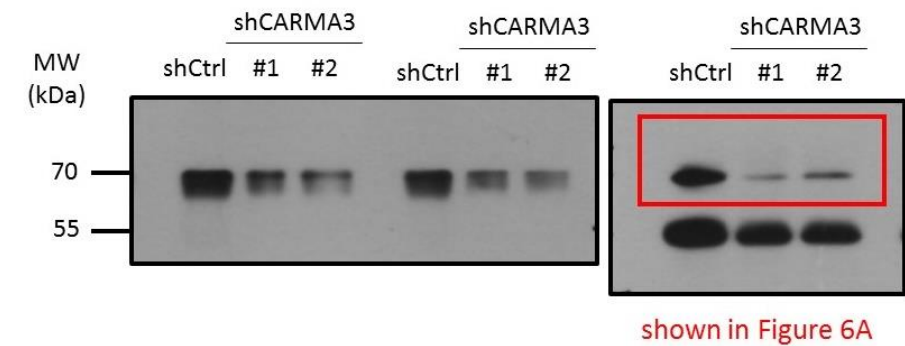

36. Figure S6A-b

Knockdown of CARMA3 by shRNA lentivirus infection  
Cell: HCT116 cell  
Protein: Slug (30 kDa)

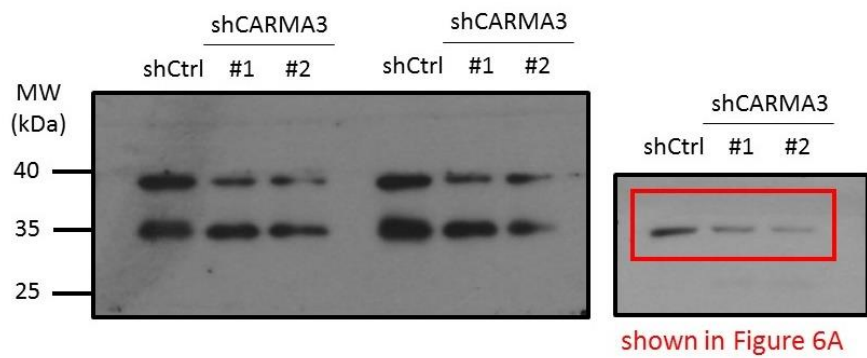

37. Figure S6A-b

Knockdown of CARMA3 by shRNA lentivirus infection  
Cell: HCT116 cell  
Protein:  $\alpha$ -Tubulin (55 kDa)

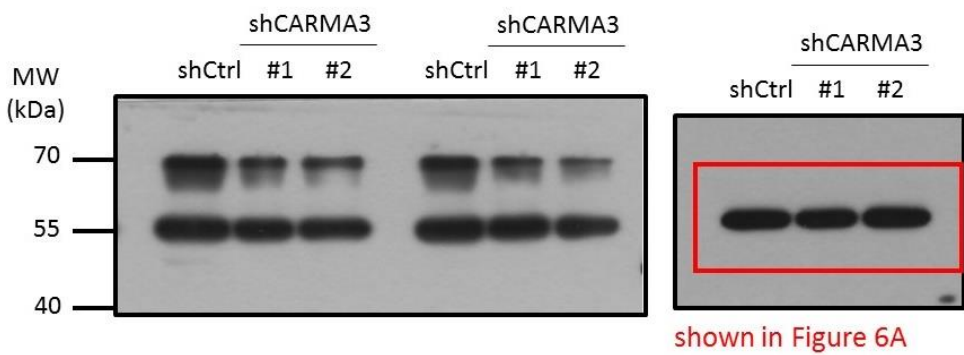

38. Figure S6C-a

Knockdown of YAP by shRNA lentivirus infection in CARMA3-overexpressed cells  
Cell: SW480 cell  
Protein: CARMA3 (116 kDa)

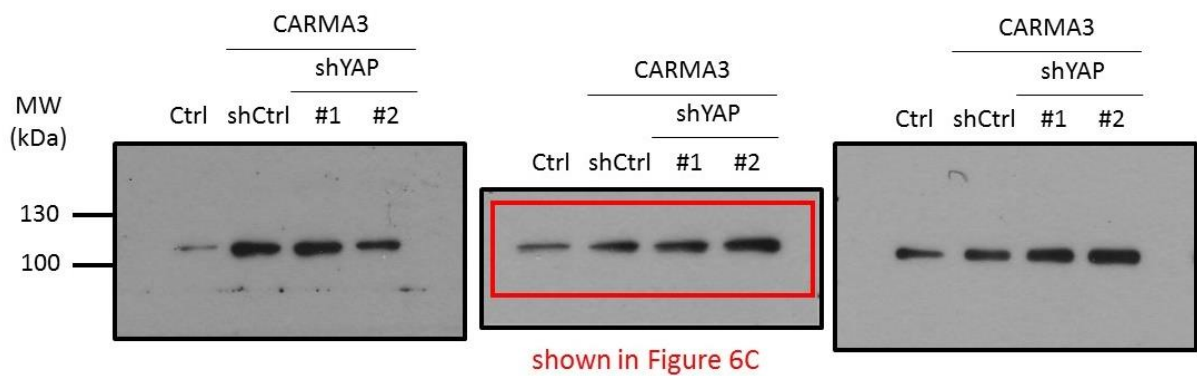

39. Figure S6C-a

Knockdown of YAP by shRNA lentivirus infection in CARMA3-overexpressed cells  
Cell: SW480 cell  
Protein: YAP (65-78 kDa)

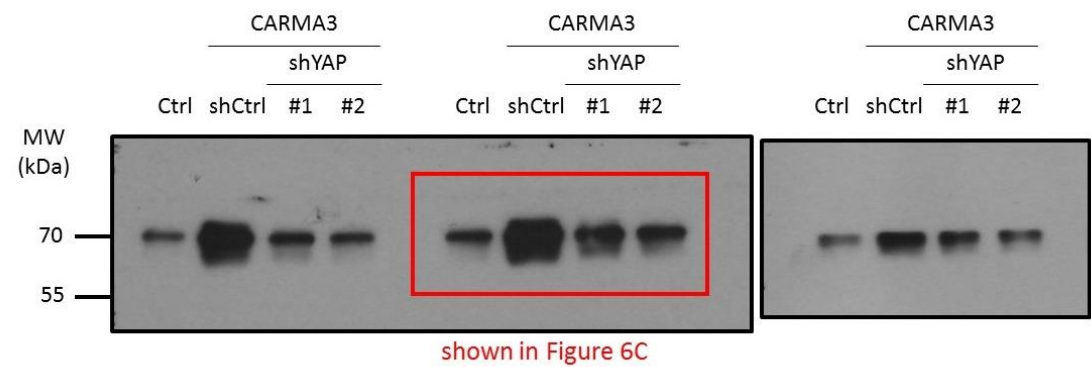

40. Figure S6C-a

Knockdown of YAP by shRNA lentivirus infection in CARMA3-overexpressed cells  
Cell: SW480 cell  
Protein: Slug (30 kDa)

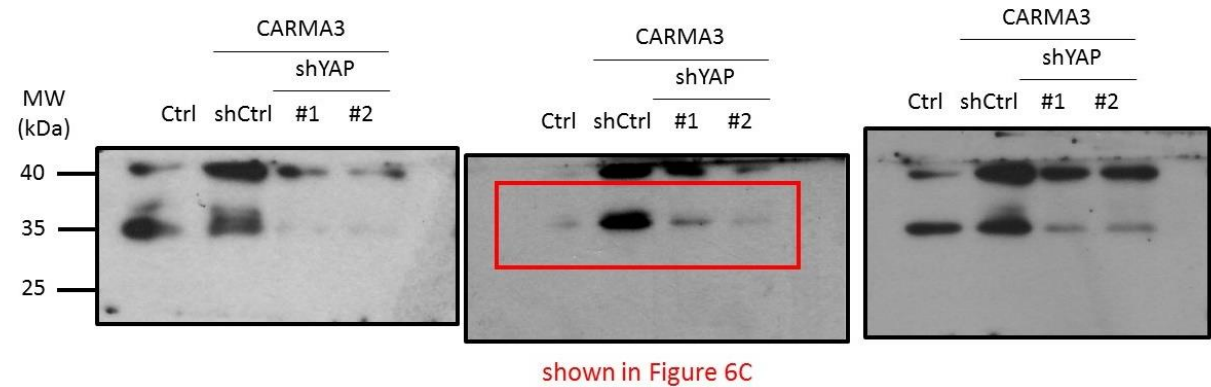

41. Figure S6C-a

Knockdown of YAP by shRNA lentivirus infection in CARMA3-overexpressed cells  
Cell: SW480 cell  
Protein:  $\alpha$ -Tubulin (55 kDa)

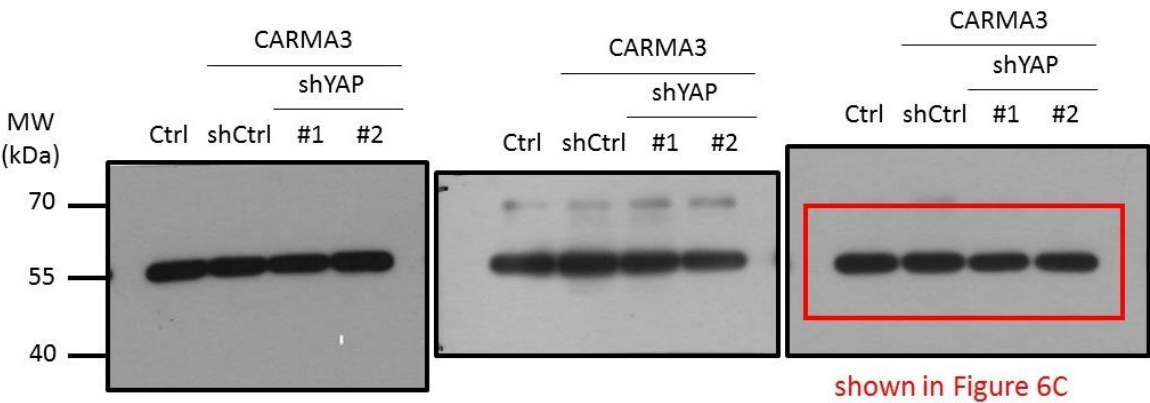

42. Figure S6C-b



Overexpression of YAP by plasmid transfection in CARMA3-silenced cells  
Cell: HCT116 cell  
Protein: CARMA3 (116 kDa)

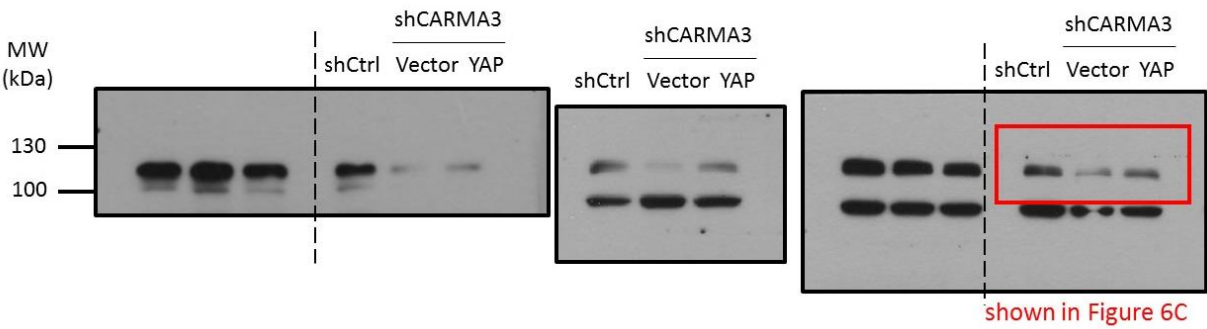

43. Figure S6C-b

Overexpression of YAP by plasmid transfection in CARMA3-silenced cells  
Cell: HCT116 cell  
Protein: YAP (65-78 kDa)

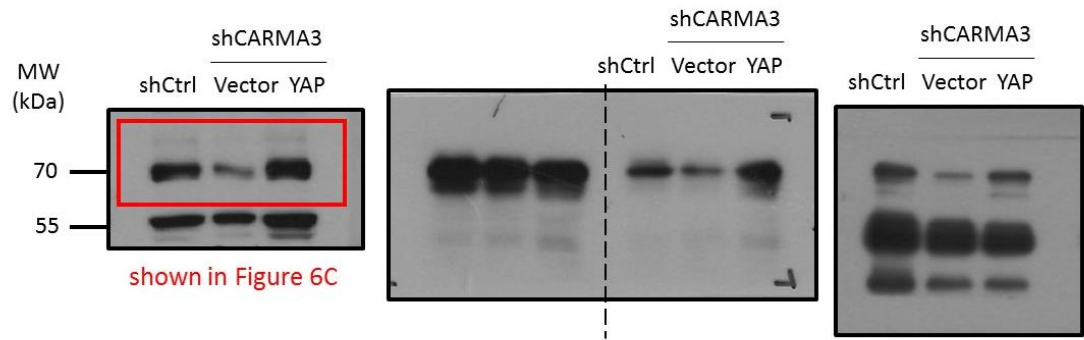

44. Figure S6C-b

Overexpression of YAP by plasmid transfection in CARMA3-silenced cells  
Cell: HCT116 cell  
Protein: Slug (30 kDa)

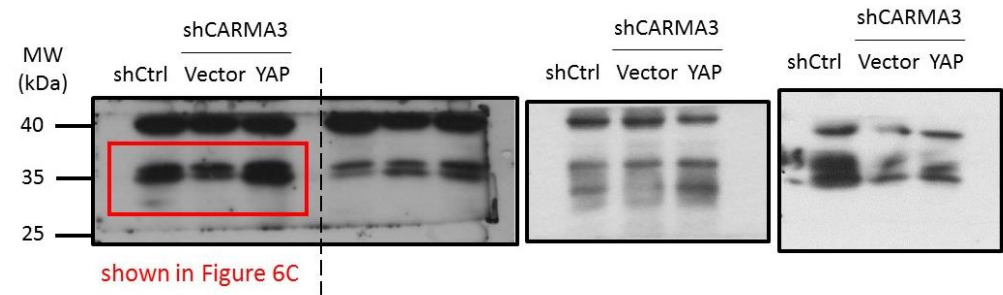

45. Figure S6C-b



Overexpression of YAP by plasmid transfection in CARMA3-silenced cells  
Cell: HCT116 cell  
Protein:  $\alpha$ -Tubulin (55 kDa)

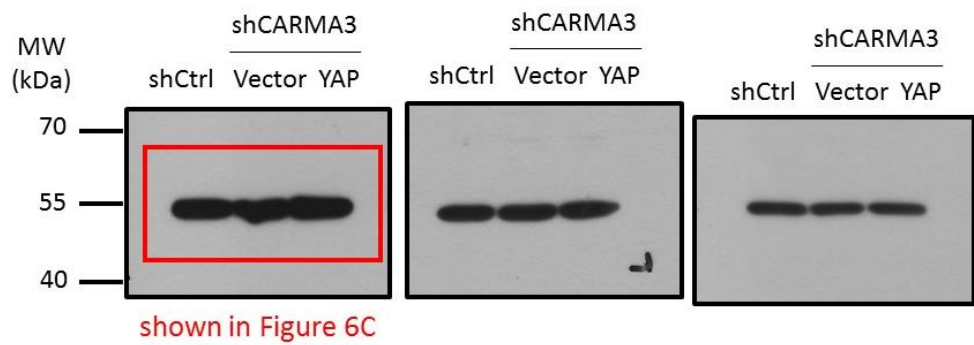

46. Figure S7A

Treatment with BAY or VP in CARMA3-overexpressed cells  
Cell: SW480 cell  
Protein: CARMA3 (116 kDa)

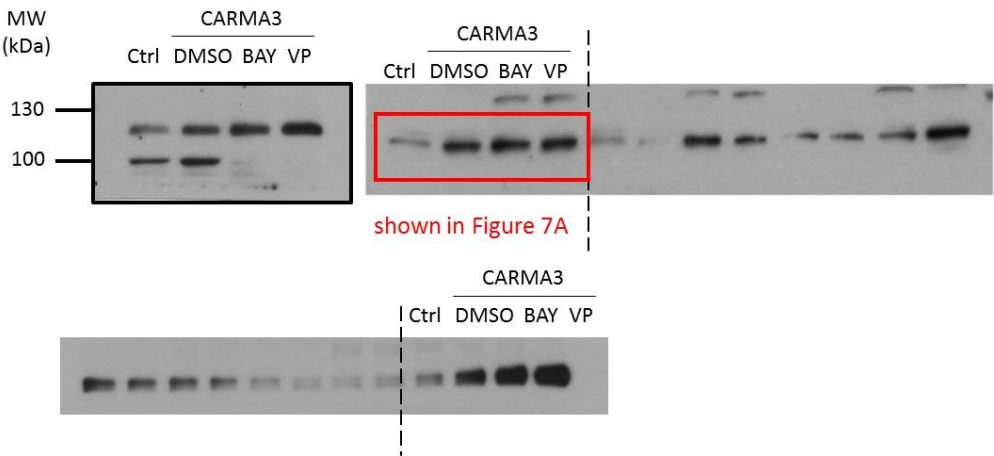

47. Figure S7A

Treatment with BAY or VP in CARMA3-overexpressed cells  
Cell: SW480 cell  
Protein: YAP (65-78 kDa)

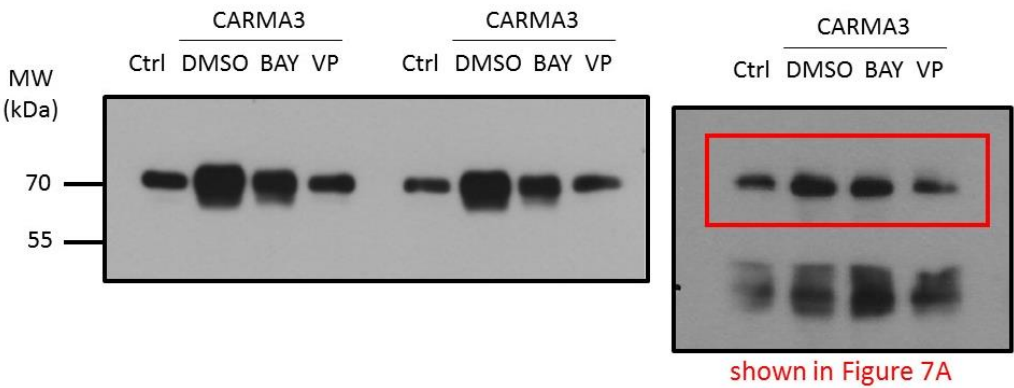

48. Figure S7A

Treatment with BAY or VP in CARMA3-overexpressed cells  
Cell: SW480 cell  
Protein: p-IkB $\alpha$  (40 kDa)

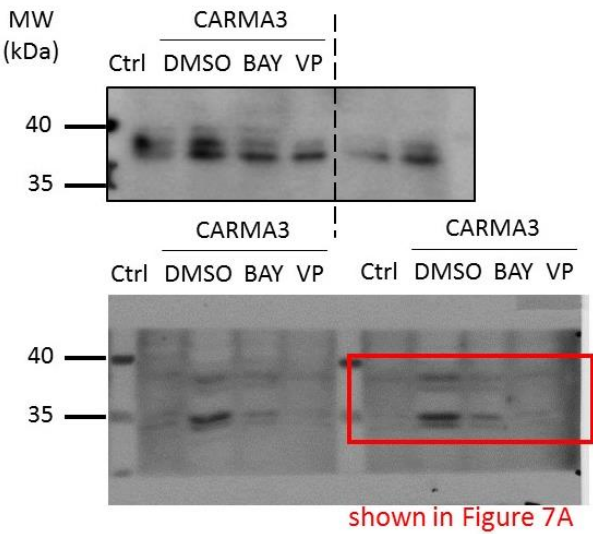

49. Figure S7A

Treatment with BAY or VP in CARMA3-overexpressed cells  
Cell: SW480 cell  
Protein: IkB $\alpha$  (35-41 kDa)

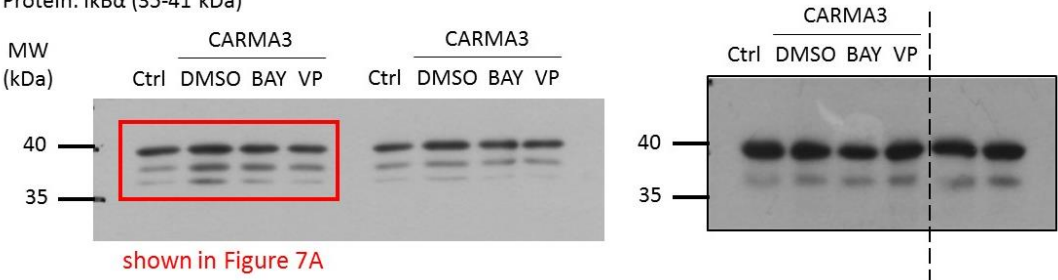

50. Figure S7A

Treatment with BAY or VP in CARMA3-overexpressed cells  
Cell: SW480 cell  
Protein: Slug (30 kDa)

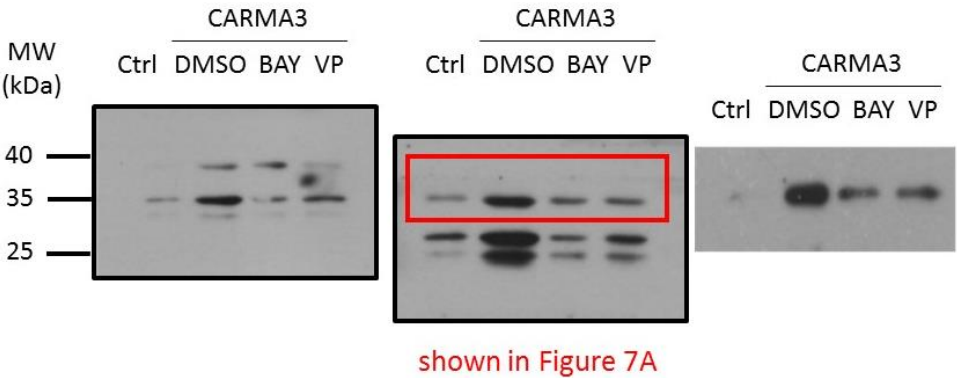

51. Figure S7A

Treatment with BAY or VP in CARMA3-overexpressed cells  
 Cell: SW480 cell  
 Protein:  $\alpha$ -Tubulin (55 kDa)

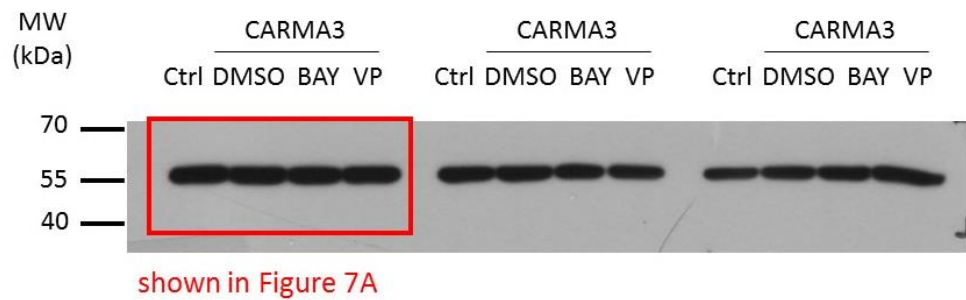

52. Figure S7C

Treatment with TNF $\alpha$  or VP in CARMA3-overexpressed cells  
 Cell: SW480 cell  
 Protein: CARMA3 (116 kDa)

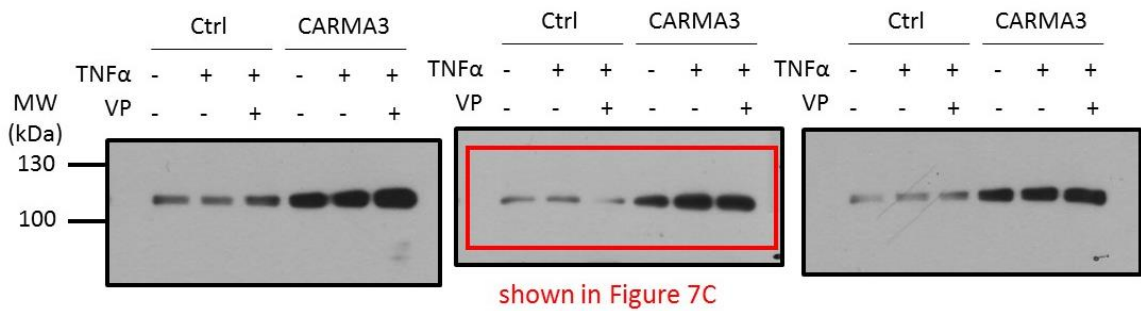

53. Figure S7C

Treatment with TNF $\alpha$  or VP in CARMA3-overexpressed cells  
 Cell: SW480 cell  
 Protein: YAP (65-78 kDa)

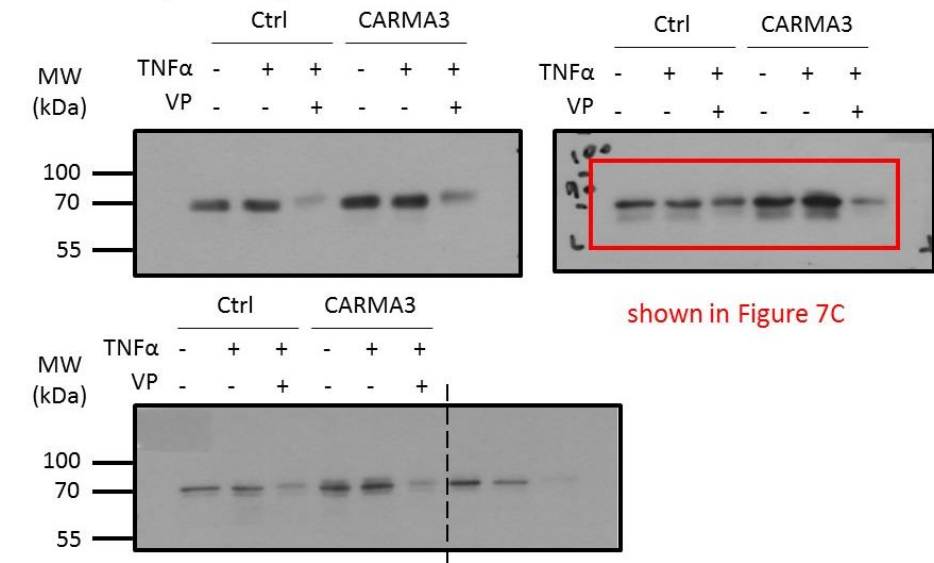

54. Figure S7C

Treatment with TNFα or VP in CARMA3-overexpressed cells  
Cell: SW480 cell  
Protein: p-IκBα (40 kDa)

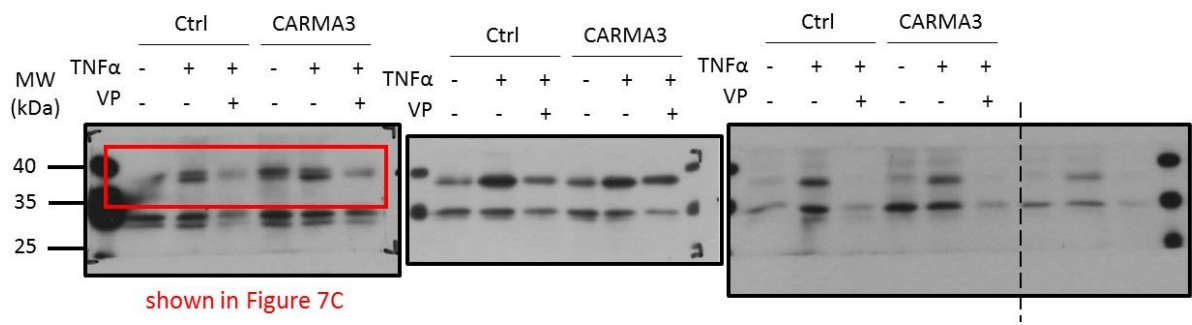

55. Figure S7C

Treatment with TNFα or VP in CARMA3-overexpressed cells  
Cell: SW480 cell  
Protein: IκBα (35-41 kDa)

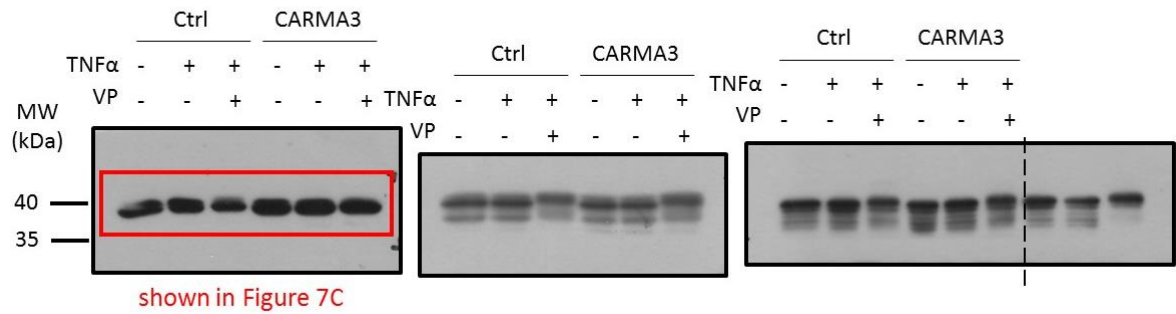

56. Figure S7C

Treatment with TNFα or VP in CARMA3-overexpressed cells  
Cell: SW480 cell  
Protein: Slug (30 kDa)

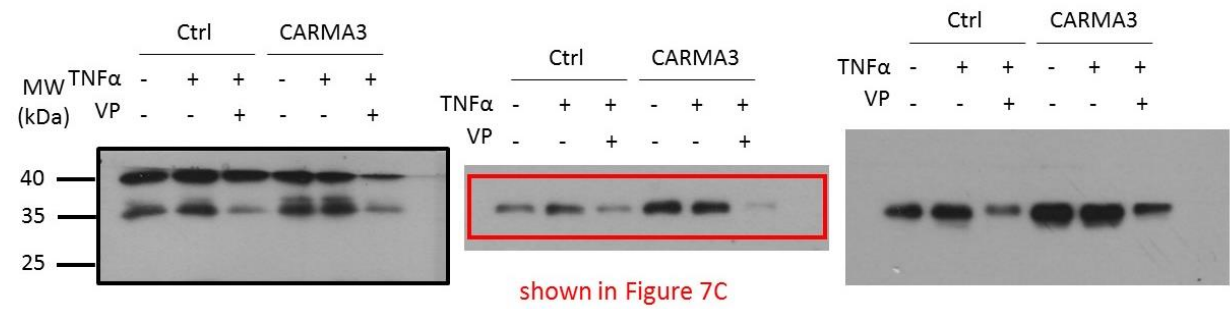

57. Figure S7C

Treatment with TNFα or VP in CARMA3-overexpressed cells  
 Cell: SW480 cell  
 Protein: α-Tubulin (55 kDa)

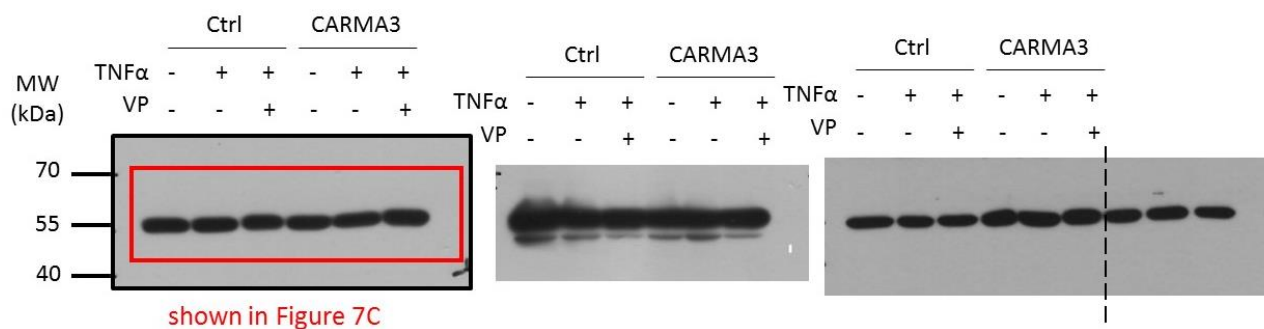

58. Figure S8A  
 Overexpression of CARMA3 by plasmid transfection in CARMA3-silenced cells  
 Cell: HCT116 cell  
 Protein: CARMA3 (116kDa)

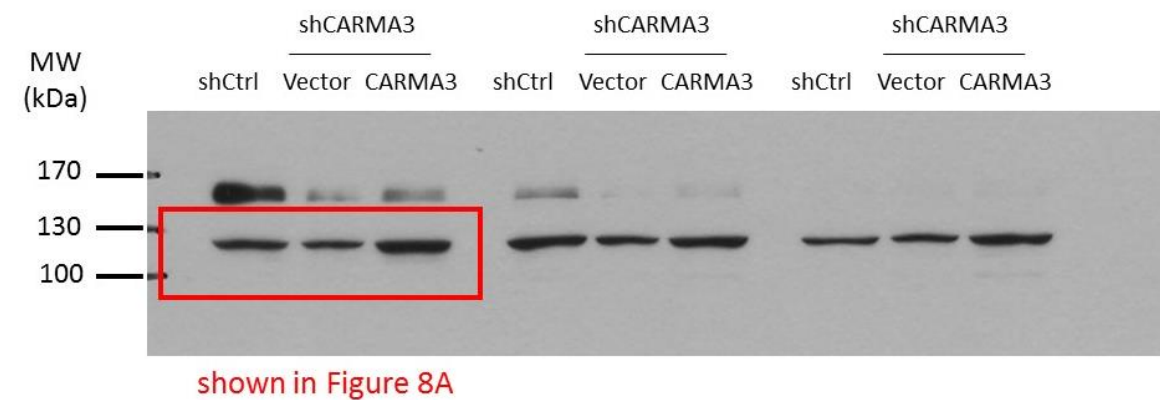

59. Figure S8A  
 Overexpression of CARMA3 by plasmid transfection in CARMA3-silenced cells  
 Cell: HCT116 cell  
 Protein: YAP (65-78 kDa)

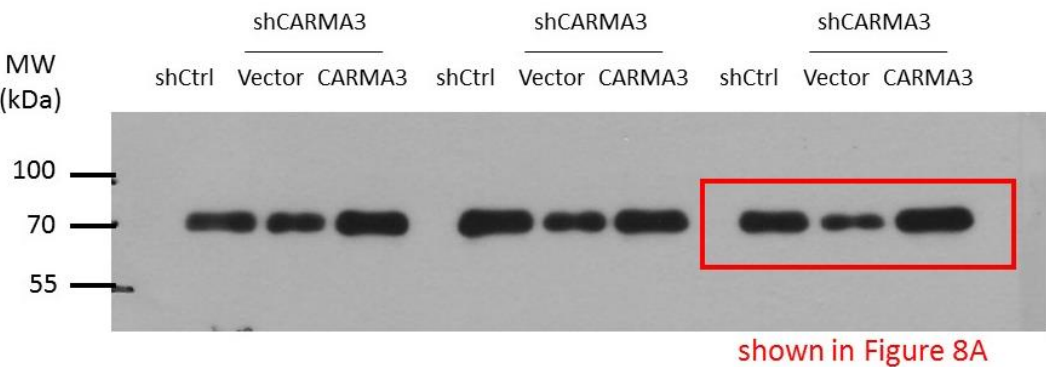

60. Figure S8A

Overexpression of CARMA3 by plasmid transfection in CARMA3-silenced cells  
Cell: HCT116 cell  
Protein: p-IkBα (40 kDa)

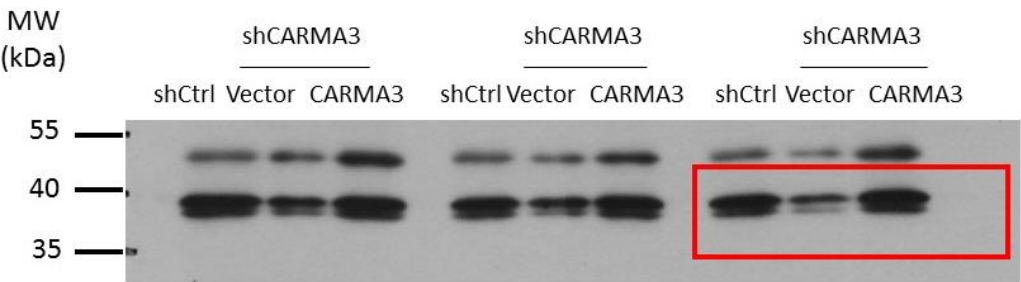

shown in Figure 8A

61. Figure S8A

Overexpression of CARMA3 by plasmid transfection in CARMA3-silenced cells  
Cell: HCT116 cell  
Protein: IkBα (35-41 kDa)

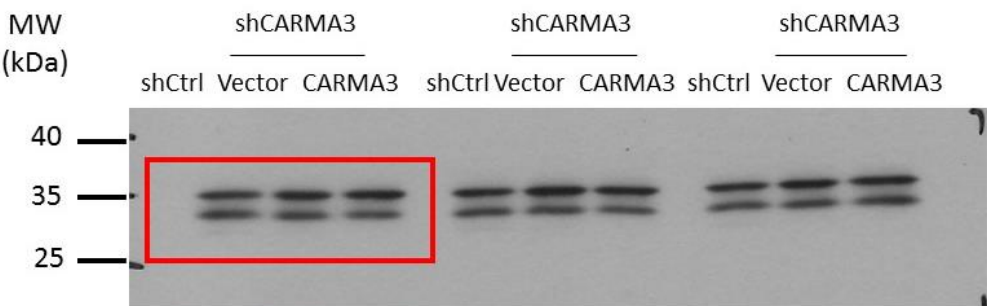

shown in Figure 8A

62. Figure S8A

Overexpression of CARMA3 by plasmid transfection in CARMA3-silenced cells  
Cell: HCT116 cell  
Protein: Slug (30 kDa)

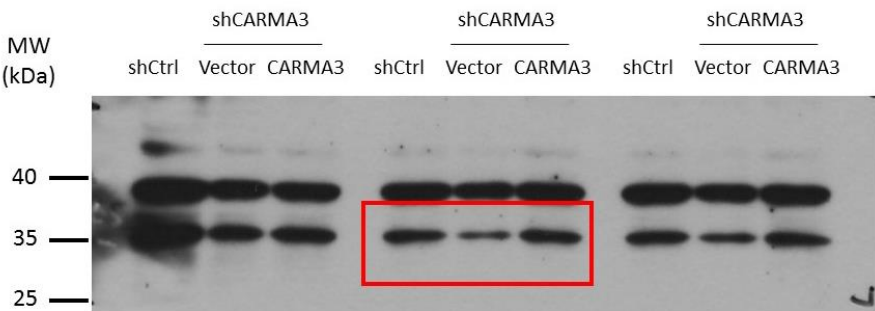

shown in Figure 8A

63. Figure S8A



Overexpression of CARMA3 by plasmid transfection in CARMA3-silenced cells  
Cell: HCT116 cell  
Protein:  $\alpha$ -Tubulin (55 kDa)

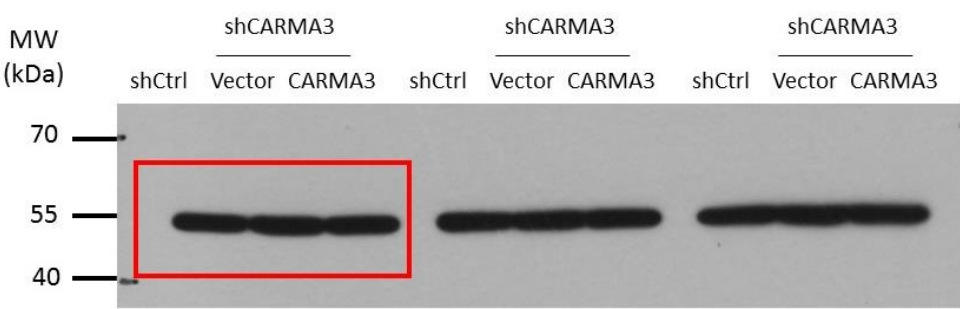

shown in Figure 8A
